# Supplementary material for: A sustainable protocol for selective alcohols oxidation using a novel iron-based metal organic framework (MOF-BASU1)
Source: Royal Society of Chemistry journal article supplement (doi:10.1039/d3ra03058j), 2023-01-01

**A sustainable protocol for selective alcohols oxidation using a novel iron-based metal organic framework (MOF-BASU1)**

Mahtab Yaghubzadeh, Sedigheh Alavinia, Ramin Ghorbani-Vaghei\*  
Department of Organic Chemistry, Faculty of Chemistry, Bu-Ali Sina University, Hamedan,  
6517838683, Iran

\*Corresponding author; E-mail: [rgvaghei@yahoo.com](mailto:rgvaghei@yahoo.com) & [ghorbani@basu.ac.ir](mailto:ghorbani@basu.ac.ir)

Tel: +98(81)38380647

**Spectral data for products.**

$^1\text{H}$  NMR (250 MHz, DMSO- $d_6$ )  $\delta$  9.99 (s, 1H), 7.90 (dd,  $J$  = 6.3, 5.2 Hz, 2H), 7.54 (d,  $J$  = 7.6 Hz, 2H),  $^{13}\text{C}$  NMR (63 MHz, DMSO- $d_6$ )  $\delta$  192.81, 166.89, 138.18, 131.57, 129.16.

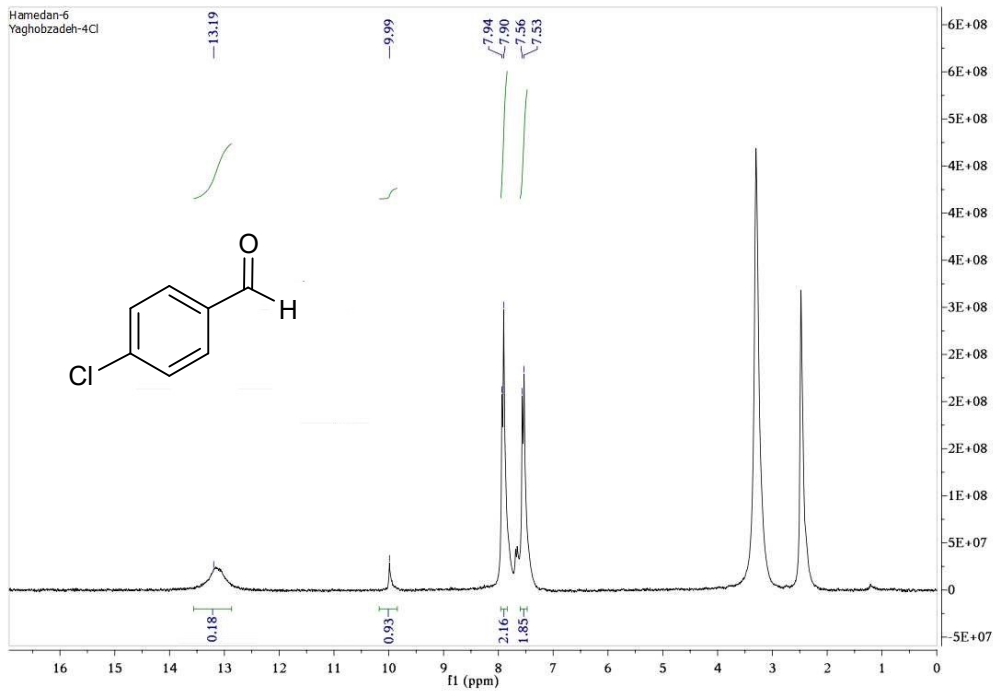

Yaghoobzadeh-4Cl

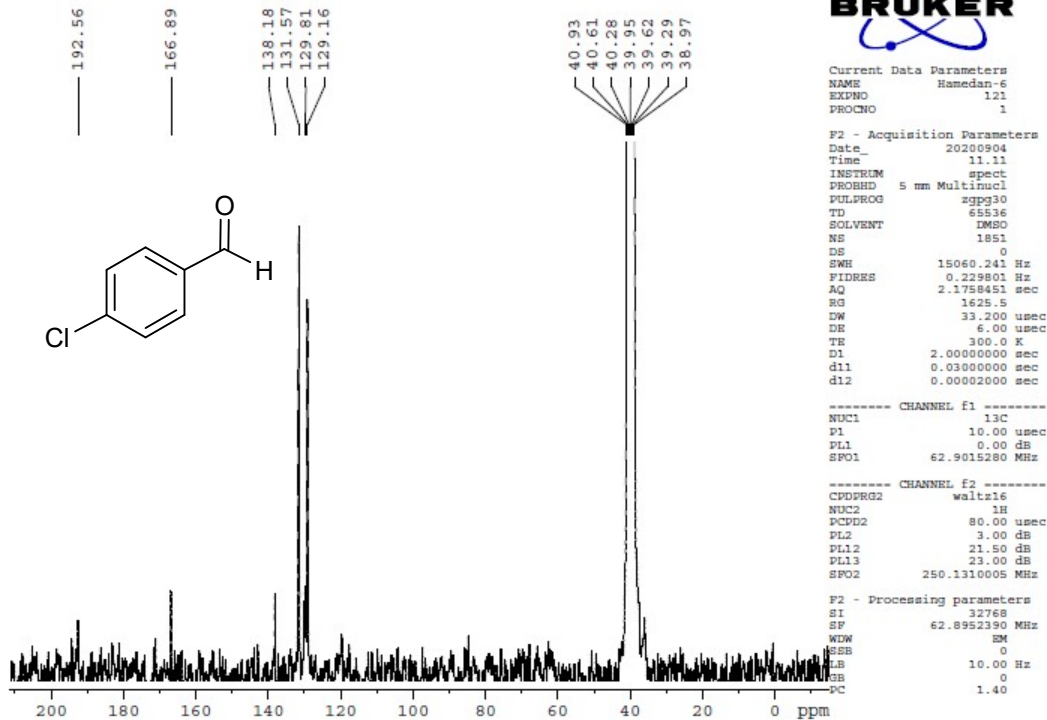

$^1\text{H}$  NMR (250 MHz,  $\text{DMSO-d}_6$ )  $\delta$  10.11 (s, 1H), 8.65 (s, 1H), 8.49 (d,  $J = 6.2$  Hz, 1H), 8.30 (d,  $J = 6.3$  Hz, 1H), 7.97 – 7.78 (m, 1H),  $^{13}\text{C}$  NMR (63 MHz,  $\text{DMSO-d}_6$ )  $\delta$  192.24, 148.69, 137.60, 135.32, 131.37, 128.95, 124.46.

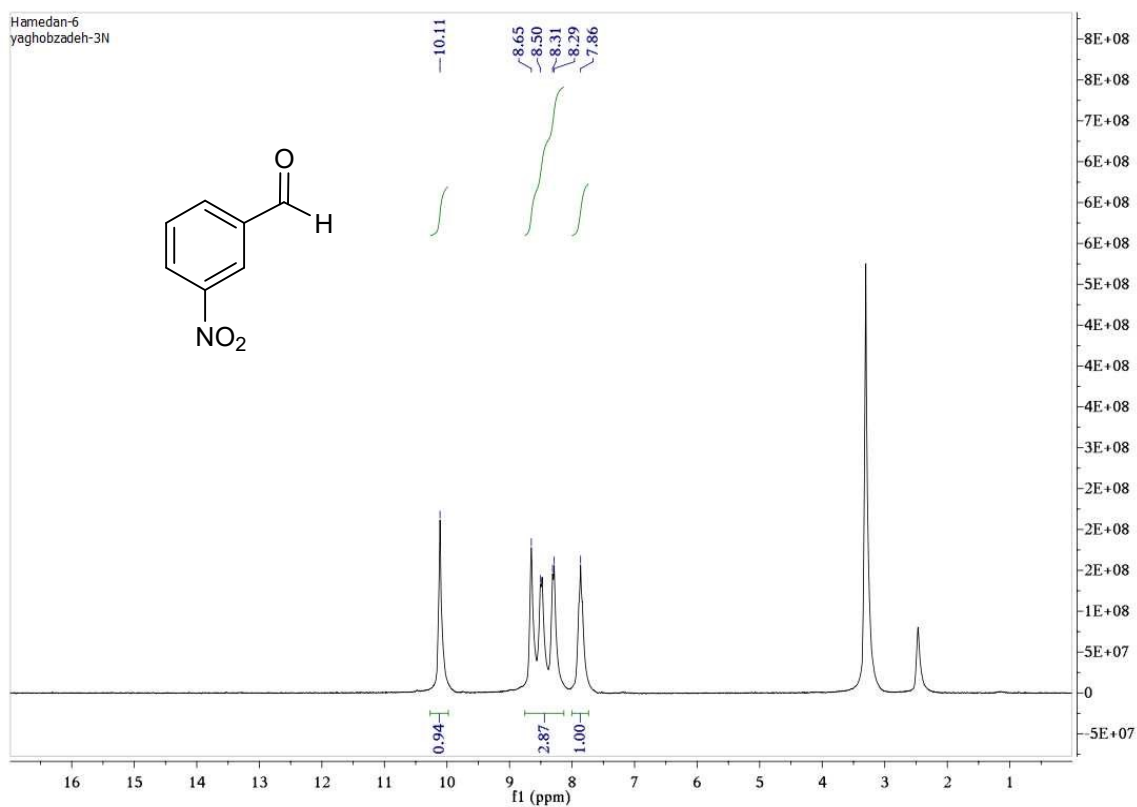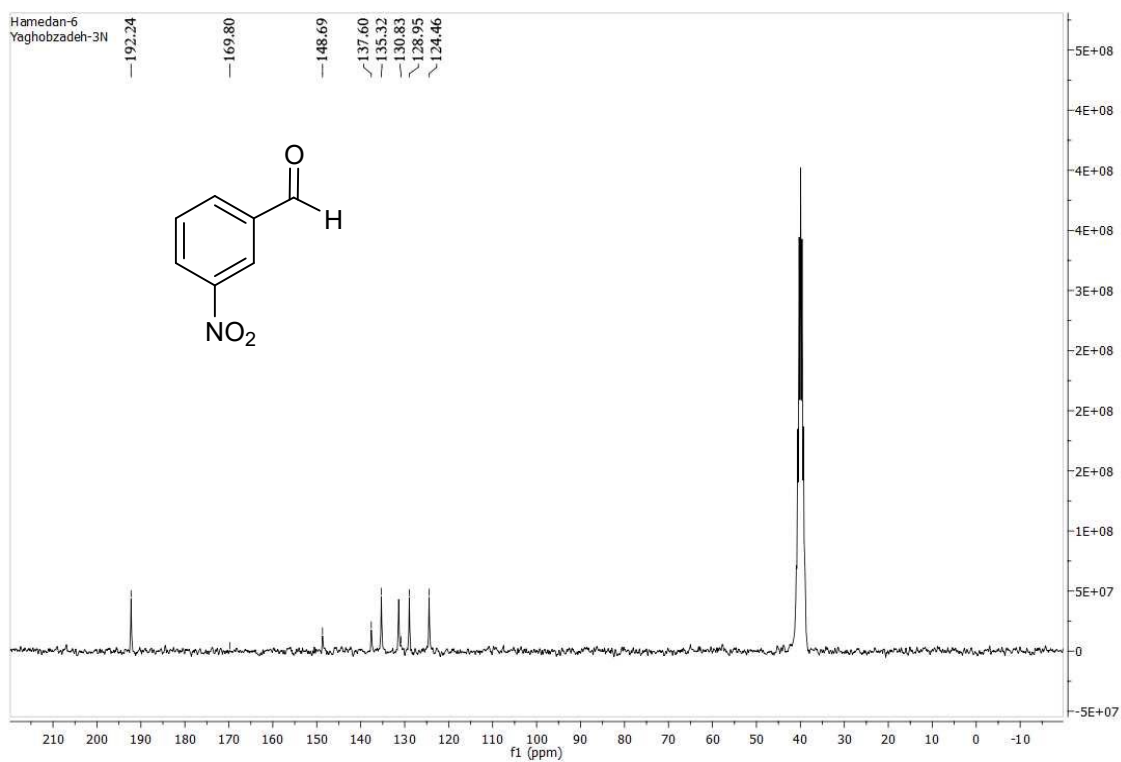

$^1\text{H}$  NMR (250 MHz,  $\text{DMSO-d}_6$ )  $\delta$  10.55 (s, 1H), 9.76 (s, 1H), 7.73 (d,  $J = 7.2$  Hz, 2H), 6.90 (d,  $J = 7.2$  Hz, 2H),  $^{13}\text{C}$  NMR (63 MHz,  $\text{DMSO-d}_6$ )  $\delta$  191.36, 163.73, 132.50, 128.83, 116.25.

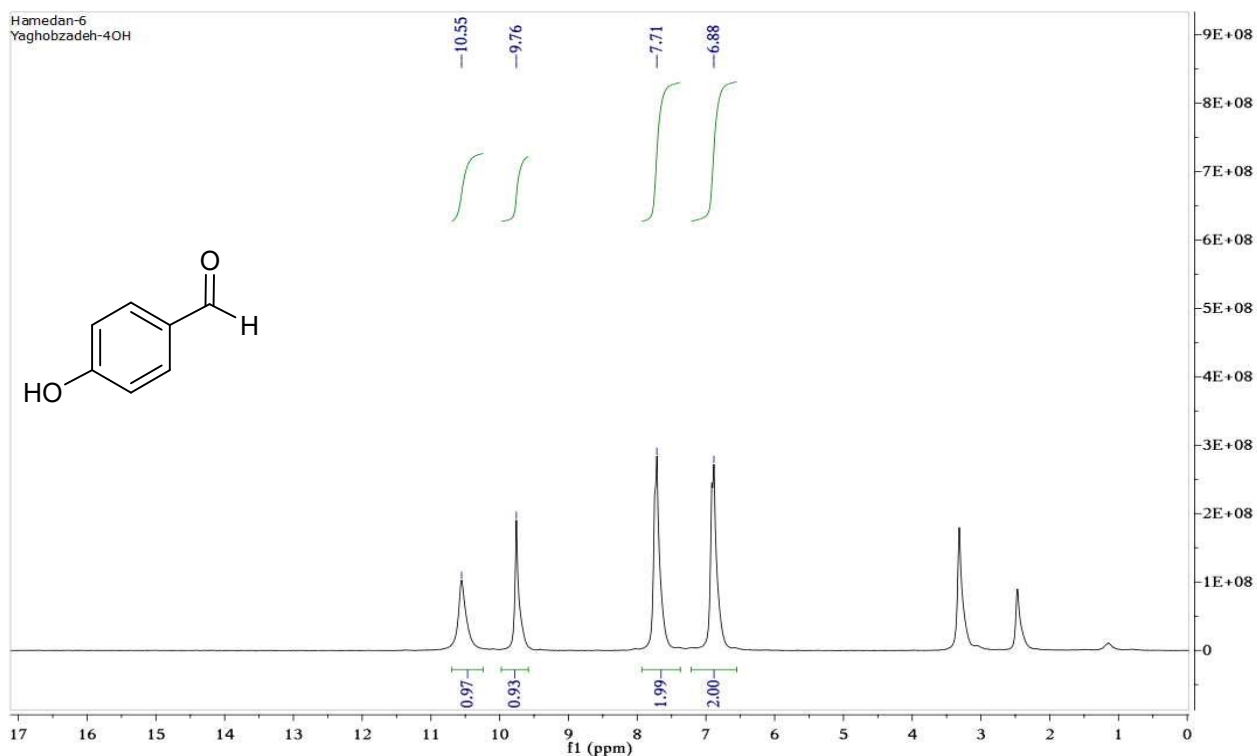

Yaghobzadeh-4OH

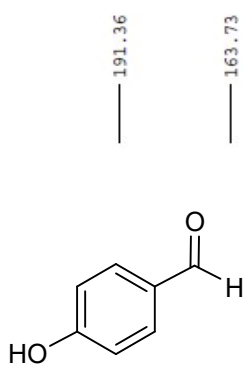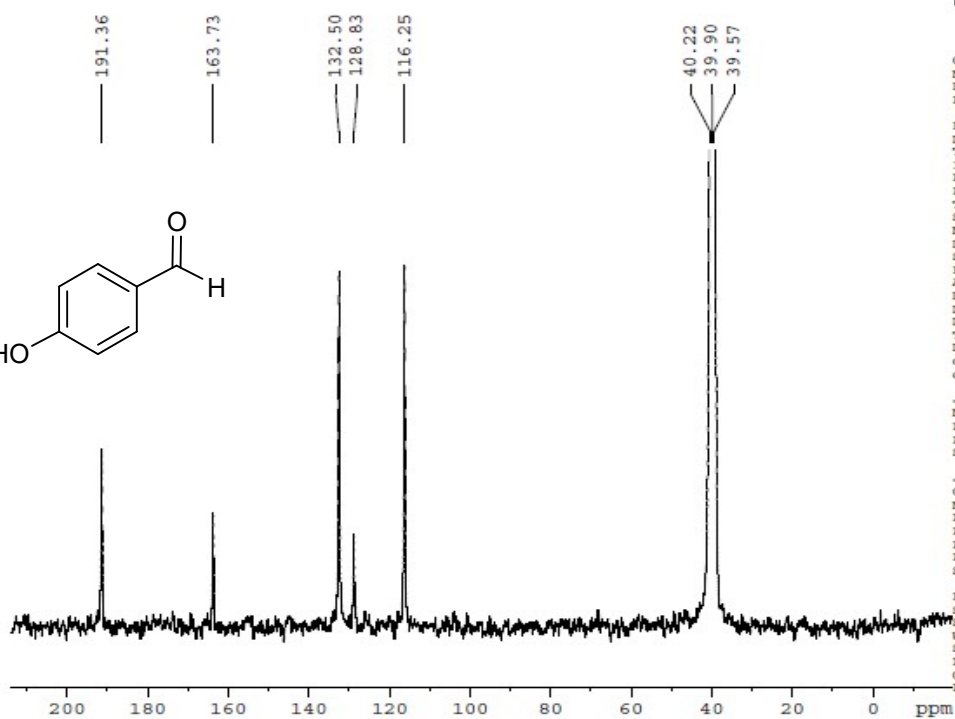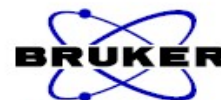

Current Data Parameters  
NAME Hamedan-6  
EXPNO 118  
PROCNO 1

F2 - Acquisition Parameters  
Date\_ 20200904  
Time 8.06  
INSTRUM spect  
PROBHD 5 mm Multinucl  
PULPROG zgpg30  
TD 65536  
SOLVENT DMSO  
NS 424  
DS 0  
SWH 15060.241 Hz  
FIDRES 0.229801 Hz  
AQ 2.1758451 sec  
RG 1625.5  
DW 33.200 usec  
DE 6.00 usec  
TE 300.0 K  
D1 2.00000000 sec  
d11 0.03000000 sec  
d12 0.00002000 sec

----- CHANNEL f1 -----  
NUC1 13C  
P1 10.00 usec  
PL1 0.00 dB  
SFO1 62.9015280 MHz

----- CHANNEL f2 -----  
CDDPRG2 waltz16  
NUC2 1H  
PCPD2 80.00 usec  
PL2 3.00 dB  
PL12 21.50 dB  
PL13 23.00 dB  
SFO2 250.1310005 MHz

F2 - Processing parameters  
SI 32768  
SF 62.8952390 MHz  
WDW EM  
SFB 0  
LB 10.00 Hz  
GB 0  
PC 1.40

$^1\text{H}$  NMR (250 MHz,  $\text{DMSO-d}_6$ )  $\delta$  10.13 (s, 1H), 8.37 (d,  $J = 6.8$  Hz, 2H), 8.12 (d,  $J = 6.4$  Hz, 2H),  $^{13}\text{C}$  NMR (63 MHz,  $\text{DMSO-d}_6$ )  $\delta$  192.69, 140.25, 131.03, 124.66, 123.66.

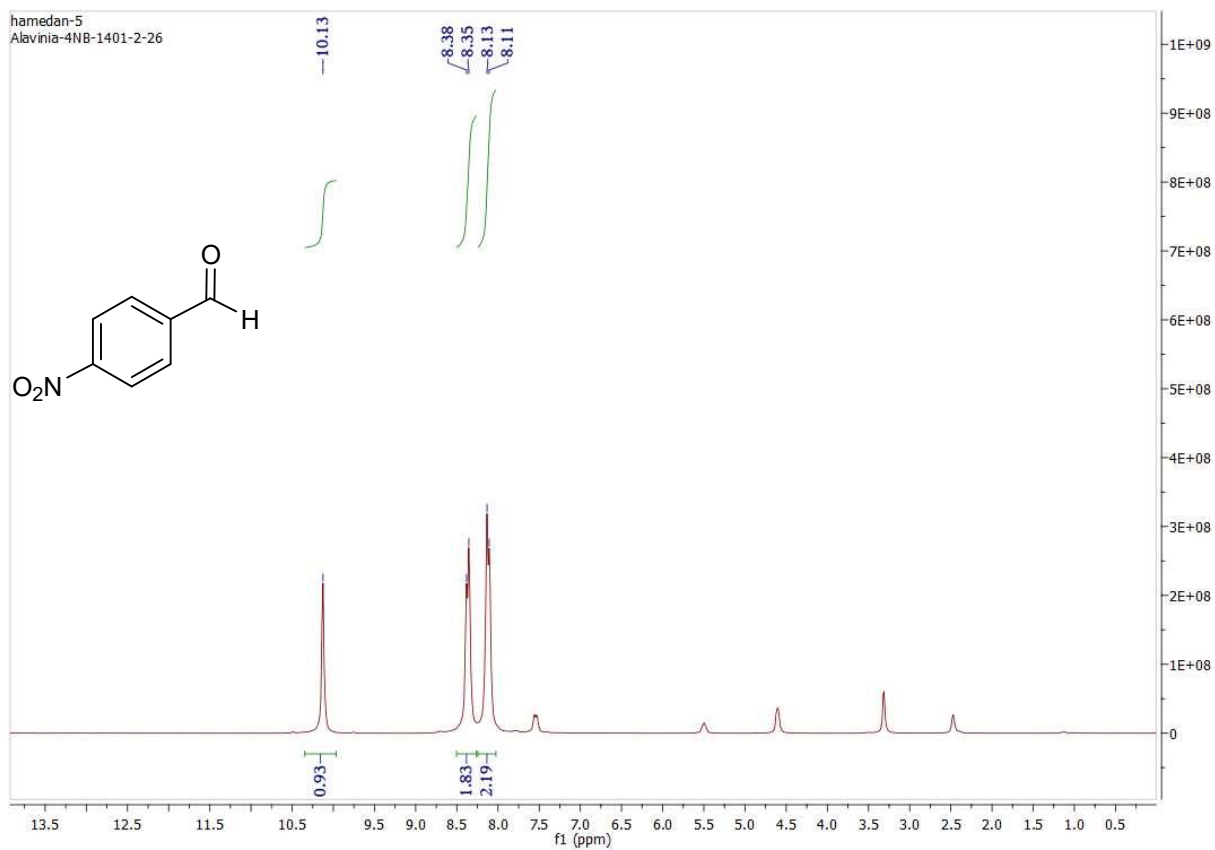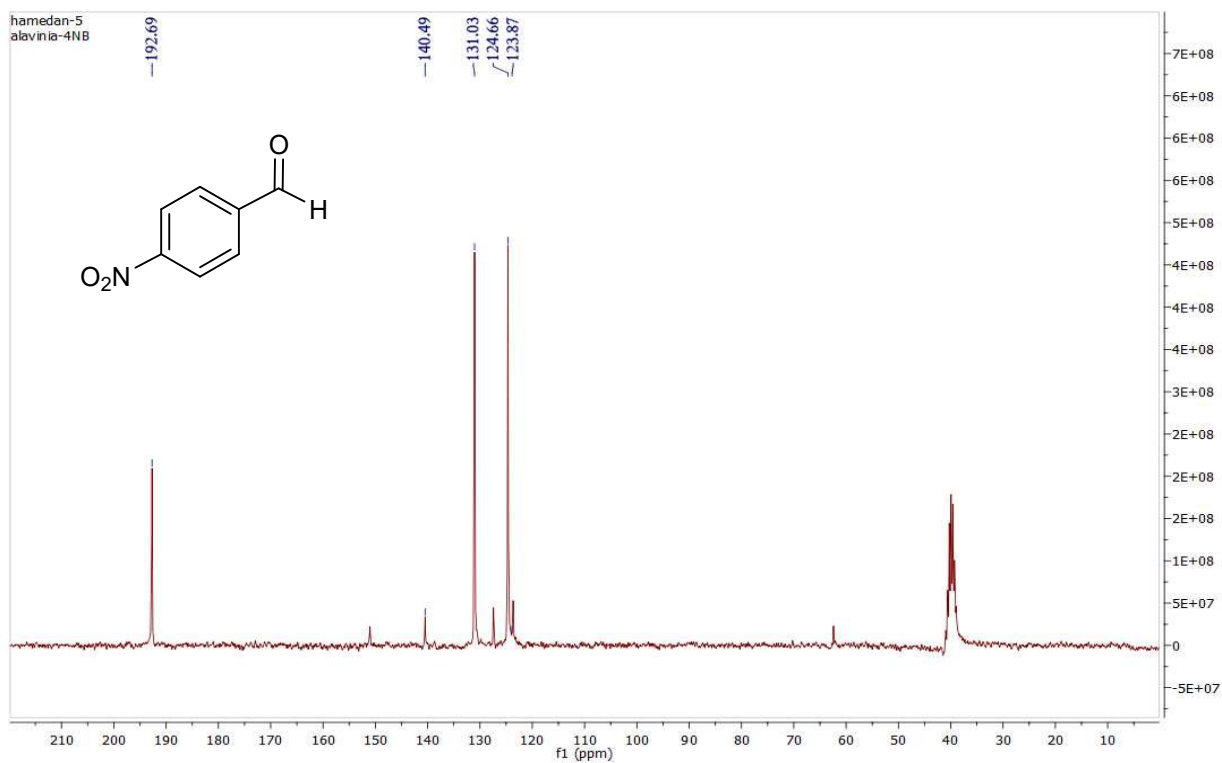

Supplement: d3ra03058j1.pdf [file d3ra03058j1.pdf]
